# Supplementary material
Source: PubMed Central journal article supplement (PMC6675603)
Supplement: EMS83837-supplement-Supplementary_File.pdf [file EMS83837-supplement-Supplementary_File.pdf]

## Supporting Information

**Coming in and Finding out: Blending Receptor Targeted Delivery and Efficient Endosomal Escape in a Novel Bio-Responsive siRNA Delivery System for Gene Knockdown in Pulmonary T Cells**

Rima Kandil, Yuran Xie, Ralf Heermann, Lorenz Isert, Kirsten Jung, Aditi Mehta, and Olivia M. Merkel\*

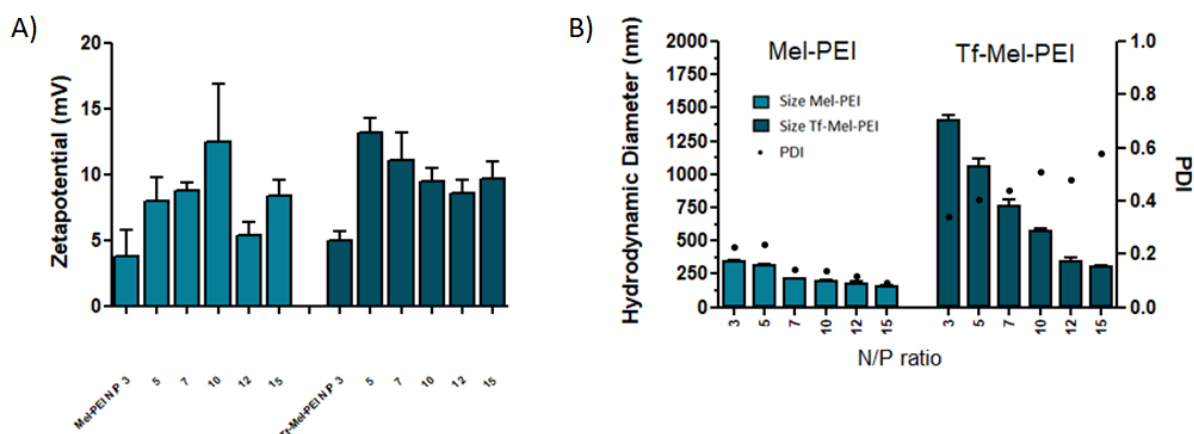

**Figure S1.** Laser Doppler anemometry and dynamic light scattering measurements of Mel-PEI and Tf-Mel-PEI polyplexes in HBS at pH 5. A) Zeta potentials and B) hydrodynamic diameters (left y-axis) and polydispersity indices (PDI, right y-axis) at different N/P ratios: 3, 5, 7, 10, 12, 15. (Data points indicate mean  $\pm$  SD,  $n = 3$ ).
